# Supplementary material for: A systematic study on the intradiffusion and structure of N,N-dimethylformamide–water mixtures: by experiment and molecular dynamics simulation
Source: Royal Society of Chemistry journal article supplement (doi:10.1039/c6ra18085j), 2016-01-01
Supplement: c6ra18085j1.pdf [file c6ra18085j1.pdf]

## Supporting information

# A systematic study on intradiffusion and structure of *N,N*-dimethylformamide-water mixtures: by experiment and molecular dynamics simulation

Jinyang Wang,<sup>1</sup> Wei Gao,<sup>2</sup> Haimin Zhong,<sup>1</sup> Canjian Liang,<sup>1</sup> Xiaojuan Chen,<sup>1</sup> Hans-Dietrich Lüdemann,<sup>3</sup> and Liuping Chen<sup>1a</sup>

<sup>a</sup>*KLGEI of Environment and Energy Chemistry, School of Chemistry and Chemical Engineering, Sun Yat-sen University, Guangzhou 510275, People's Republic of China*

<sup>b</sup>*School of Pharmacy, Guangdong Pharmaceutical University, Guangzhou 510006, People's Republic of China*

<sup>c</sup>*Institut für Biophysik und Physikalische Biochemie, Universität Regensburg, D-93040 Regensburg, Germany*

\*Corresponding author, E-mail: cesclp@mail.sysu.edu.cn

**Table S 1** Measured intradiffusion coefficients (in  $10^{-9} \text{ m}^2 \text{ s}^{-1}$ ) of water molecule in DMF-water mixtures at various temperatures, pressures, and compositions.

| <i>T</i> (K) | $x_{\text{DMF}} = 0.124$ |        |        |         |         |         |
|--------------|--------------------------|--------|--------|---------|---------|---------|
|              | 2 MPa                    | 10 MPa | 50 MPa | 100 MPa | 150 MPa | 200 MPa |
| 422.3        | –                        | –      | –      | –       | –       | –       |
| 372.6        | 5.08                     | –      | 4.29   | 3.67    | 3.13    | 2.65    |
| 333.7        | 2.83                     | –      | 2.34   | 1.95    | 1.70    | 1.48    |
| 313.4        | 1.98                     | –      | 1.66   | 1.39    | 1.19    | 1.01    |
| 298.3        | 1.46                     | –      | 1.19   | 0.991   | 0.830   | 0.715   |
| 278.4        | 0.891                    | –      | 0.727  | 0.607   | 0.496   | 0.415   |
| 256.3        | 0.468                    | –      | 0.381  | 0.301   | 0.246   | 0.202   |
| 243.3        | 0.311                    | –      | 0.236  | 0.186   | 0.149   | 0.120   |
| 233.1        | 0.210                    | –      | –      | –       | –       | –       |
| <i>T</i> (K) | $x_{\text{DMF}} = 0.250$ |        |        |         |         |         |
| 422.3        | 9.22                     | –      | –      | 7.22    | –       | –       |
| 372.6        | 4.73                     | 4.61   | 4.19   | 3.79    | 3.48    | 3.20    |
| 333.7        | 2.22                     | 2.18   | 1.98   | 1.79    | 1.62    | 1.50    |
| 313.4        | 1.34                     | 1.31   | 1.19   | 1.07    | 0.966   | 0.886   |
| 298.3        | 0.839                    | 0.826  | 0.747  | 0.668   | 0.604   | 0.549   |
| 278.4        | 0.425                    | –      | 0.368  | 0.322   | 0.289   | 0.257   |
| 256.3        | 0.140                    | –      | 0.121  | 0.104   | 0.0894  | 0.0760  |
| 243.3        | 0.0631                   | –      | 0.0497 | 0.0403  | 0.0336  | 0.0285  |
| 233.1        | 0.0273                   | –      | –      | –       | –       | –       |

**Table S 1** (continued)

| <i>T</i> (K) | $x_{\text{DMF}} = 0.328$ |        |        |         |         |         |
|--------------|--------------------------|--------|--------|---------|---------|---------|
|              | 2 MPa                    | 10 MPa | 50 MPa | 100 MPa | 150 MPa | 200 MPa |
| 422.3        | 9.15                     | –      | –      | 6.89    | –       | –       |
| 372.6        | 4.51                     | –      | 3.98   | 3.52    | 3.20    | 2.97    |
| 333.7        | 2.19                     | –      | 1.90   | 1.68    | 1.49    | 1.37    |
| 313.4        | 1.33                     | –      | 1.15   | 1.01    | 0.904   | 0.817   |
| 298.3        | 0.858                    | –      | 0.730  | 0.631   | 0.558   | 0.507   |
| 278.4        | 0.425                    | –      | 0.364  | 0.309   | 0.267   | 0.233   |
| 256.3        | 0.150                    | –      | 0.122  | 0.101   | 0.0820  | 0.0686  |
| 243.3        | 0.0684                   | –      | 0.0533 | 0.0416  | 0.0325  | 0.0260  |
| 233.1        | 0.0311                   | –      | –      | –       | –       | –       |
| <i>T</i> (K) | $x_{\text{DMF}} = 0.500$ |        |        |         |         |         |
| 422.3        | 8.64                     | –      | –      | 6.50    | –       | –       |
| 372.6        | 4.66                     | 4.49   | 3.93   | 3.38    | 2.99    | 2.69    |
| 333.7        | 2.29                     | 2.22   | 1.93   | 1.65    | 1.44    | 1.28    |
| 313.4        | 1.45                     | 1.41   | 1.22   | 1.04    | 0.902   | 0.784   |
| 298.3        | 0.96                     | 0.929  | 0.799  | 0.671   | 0.574   | 0.506   |
| 278.4        | 0.52                     | 0.496  | 0.428  | 0.354   | 0.296   | 0.249   |
| 256.3        | 0.218                    | 0.206  | 0.172  | 0.137   | 0.112   | 0.0915  |
| 243.3        | 0.115                    | –      | 0.0853 | 0.0677  | 0.0526  | 0.0425  |
| 233.1        | 0.0672                   | –      | –      | –       | –       | –       |
| <i>T</i> (K) | $x_{\text{DMF}} = 0.765$ |        |        |         |         |         |
| 422.3        | 10.5                     | –      | –      | 8.85    | –       | –       |
| 372.6        | 5.59                     | –      | 5.17   | 4.80    | 4.55    | 4.32    |
| 333.7        | 2.80                     | –      | 2.61   | 2.46    | 2.34    | 2.23    |
| 313.4        | 1.75                     | –      | 1.65   | 1.56    | 1.49    | 1.43    |
| 298.3        | 1.16                     | –      | 1.09   | 1.04    | 0.995   | 0.953   |
| 278.4        | 0.614                    | –      | 0.583  | 0.555   | 0.534   | 0.519   |
| 256.3        | 0.217                    | –      | 0.210  | 0.202   | 0.195   | 0.188   |
| 243.3        | –                        | –      | –      | –       | –       | –       |
| 233.1        | –                        | –      | –      | –       | –       | –       |

**Table S 2** Measured intradiffusion coefficients (in  $10^{-9} \text{ m}^2 \text{ s}^{-1}$ ) of DMF molecule in DMF-water mixtures at various temperatures, pressures, and compositions.

| $T$ (K) | $x_{\text{DMF}} = 0.124$ |        |        |         |         |         |
|---------|--------------------------|--------|--------|---------|---------|---------|
|         | 2 MPa                    | 10 MPa | 50 MPa | 100 MPa | 150 MPa | 200 MPa |
| 422.3   | –                        | –      | –      | –       | –       | –       |
| 372.6   | 3.55                     | –      | 2.88   | 2.38    | 2.04    | 1.78    |
| 333.7   | 2.22                     | –      | 1.76   | 1.46    | 1.24    | 1.07    |
| 313.4   | 1.64                     | –      | 1.31   | 1.07    | 0.90    | 0.762   |
| 298.3   | 1.26                     | –      | 0.999  | 0.816   | 0.678   | 0.571   |
| 278.4   | 0.848                    | –      | 0.660  | 0.530   | 0.425   | 0.352   |
| 256.3   | 0.502                    | –      | 0.381  | 0.293   | 0.230   | 0.181   |
| 243.3   | 0.339                    | –      | 0.248  | 0.188   | 0.144   | 0.111   |
| 233.1   | 0.235                    | –      | –      | –       | –       | –       |
| $T$ (K) | $x_{\text{DMF}} = 0.250$ |        |        |         |         |         |
| 422.3   | –                        | –      | –      | –       | –       | –       |
| 372.6   | 2.79                     | 2.72   | 2.43   | 2.13    | 1.90    | 1.72    |
| 333.7   | 1.34                     | –      | 1.18   | 1.03    | 0.92    | 0.821   |
| 313.4   | 0.849                    | 0.818  | 0.717  | 0.621   | 0.549   | 0.496   |
| 298.3   | 0.535                    | 0.515  | 0.447  | 0.386   | 0.337   | 0.305   |
| 278.4   | 0.268                    | 0.261  | 0.225  | 0.190   | 0.164   | 0.142   |
| 256.3   | 0.0885                   | –      | 0.0714 | 0.0571  | 0.0468  | 0.0380  |
| 243.3   | 0.0378                   | –      | 0.0288 | 0.0223  | 0.0180  | 0.0142  |
| 233.1   | 0.0165                   | –      | –      | –       | –       | –       |
| $T$ (K) | $x_{\text{DMF}} = 0.328$ |        |        |         |         |         |
| 422.3   | –                        | –      | –      | –       | –       | –       |
| 372.6   | 2.81                     | –      | 2.39   | 2.08    | 1.85    | 1.65    |
| 333.7   | 1.42                     | –      | 1.19   | 1.02    | 0.898   | 0.806   |
| 313.4   | 0.887                    | –      | 0.749  | 0.639   | 0.547   | 0.488   |
| 298.3   | 0.589                    | –      | 0.483  | 0.401   | 0.347   | 0.304   |
| 278.4   | 0.297                    | –      | 0.242  | 0.196   | 0.163   | 0.136   |
| 256.3   | 0.104                    | –      | 0.0802 | 0.0618  | 0.0492  | 0.0392  |
| 243.3   | 0.0467                   | –      | 0.0343 | 0.0254  | 0.0196  | 0.0152  |
| 233.1   | 0.0211                   | –      | –      | –       | –       | –       |
| $T$ (K) | $x_{\text{DMF}} = 0.500$ |        |        |         |         |         |
| 422.3   | –                        | –      | –      | –       | –       | –       |
| 372.6   | 3.03                     | 2.91   | 2.49   | 2.13    | 1.84    | 1.62    |
| 333.7   | 1.64                     | 1.58   | 1.34   | 1.13    | 0.961   | 0.829   |
| 313.4   | 1.09                     | 1.05   | 0.888  | 0.733   | 0.621   | 0.53    |
| 298.3   | 0.753                    | 0.729  | 0.608  | 0.492   | 0.413   | 0.352   |
| 278.4   | 0.437                    | 0.414  | 0.341  | 0.276   | 0.224   | 0.181   |
| 256.3   | 0.197                    | –      | 0.148  | 0.113   | 0.0875  | 0.0667  |
| 243.3   | 0.103                    | –      | 0.0744 | 0.0540  | 0.0390  | 0.0287  |

**Table S 2** (continued)

| $T$ (K) | $x_{\text{DMF}} = 0.500$ |        |        |         |         |         |
|---------|--------------------------|--------|--------|---------|---------|---------|
|         | 2 MPa                    | 10 MPa | 50 MPa | 100 MPa | 150 MPa | 200 MPa |
| 233.1   | 0.0609                   | –      | –      | –       | –       | –       |
| $T$ (K) | $x_{\text{DMF}} = 0.765$ |        |        |         |         |         |
| 422.3   | –                        | –      | –      | –       | –       | –       |
| 372.6   | 3.06                     | –      | 2.78   | 2.53    | 2.31    | 2.13    |
| 333.7   | 1.55                     | –      | 1.39   | 1.27    | 1.17    | 1.10    |
| 313.4   | 0.960                    | –      | 0.881  | 0.810   | 0.750   | 0.701   |
| 298.3   | 0.624                    | –      | 0.577  | 0.535   | 0.496   | 0.465   |
| 278.4   | 0.329                    | –      | 0.298  | 0.274   | 0.255   | 0.241   |
| 256.3   | 0.109                    | –      | 0.100  | 0.0923  | 0.0853  | 0.0802  |
| 243.3   | –                        | –      | –      | –       | –       | –       |
| 233.1   | –                        | –      | –      | –       | –       | –       |
